# Supplementary material for: Surface engineered NiFe 2 O 4 /SnO 2 /CeO 2 ternary heterojunction for dual applications in photocatalytic water treatment and supercapacitors
Source: Royal Society of Chemistry journal article supplement (doi:10.1039/d5ra07855e), 2025-01-01
Supplement: d5ra07855e1.pdf [file d5ra07855e1.pdf]

## Surface Engineered NiFe<sub>2</sub>O<sub>4</sub>/SnO<sub>2</sub>/CeO<sub>2</sub> Ternary Heterojunction for Dual Applications in Photocatalytic Water Treatment and Supercapacitors

Adewumi O. Oluwole<sup>a</sup>, Samba Sarr<sup>a</sup>, Tunde L. Yusuf<sup>b</sup>, Shepherd M. Tichapondwa<sup>a</sup>, Michael O. Daramola<sup>a</sup>, Samuel A. Iwarere<sup>a\*</sup>

<sup>a</sup> Department of Chemical Engineering, Faculty of Engineering, Built Environment and Information Technology, University of Pretoria, Hatfield, Pretoria 0002, South Africa

<sup>b</sup> Department of Chemistry, Faculty of Natural and Agricultural Sciences, University of Pretoria, Hatfield, Pretoria 0002, South Africa

\*Corresponding author. Tel: +27-12-420-3092. E-mail: samuel.iwarere@up.ac.za (Samuel Iwarere)

### Text S1: Characterization

Powder X-ray diffraction (XRD) measurements using a PANalytical X'Pert Pro powder X-ray diffractometer in  $\theta$ – $\theta$  configuration and Cu-K $\alpha$  radiation ( $\lambda = 1.789 \text{ \AA}$ ) were used to investigate the structure and crystallinity of the synthesized nanocomposites. A PerkinElmer Spectrum One spectrometer was used to record the FTIR spectra of the photocatalyst samples using the KBr pellet approach. To examine the morphologies and elemental composition, field emission scanning electron microscopy (FESEM, JSM-6400) fitted with an EDS analyzer was utilized. A Thermo Scientific ESCALAB 250Xi spectrometer equipped with a monochromatic Al-K $\alpha$  X-ray source (1486.7 eV) at 150 W was used to perform X-ray photoelectron spectroscopy (XPS) on the ternary nanocomposite material to assess its surface valence, elemental compositions, and electronic structure. The specific surface area and pore distribution of the nanocomposites were assessed using the Brunauer–Emmett–Teller (BET) micrometrics Tristar II 3020 Version 3.02 system. To evaluate the nanocomposites' ability to absorb light, a UV-vis spectrophotometer (Agilent Technologies Cary 60 UV-vis, Malaysia) was utilized.

### Text S2: Electrochemical Procedures

In this study, the electrodes used were fabricated by mixing the as-prepared samples as active materials, acetylene carbon black (ACB) as the conductive additive and polyvinylidene fluoride (PVDF) as a binder in a mass ratio (in percentage) of 80:10:10 respectively, in an agate mortar with the dropwise addition of N-methyl pyrrolidone (NMP) to make a homogenous slurry. The

resulting slurry was then pasted onto rectangular (1\*2 cm<sup>2</sup>) clean nickel form adopted as a current collector to fabricate electrodes for three-electrode measurements. The electrodes were then dried at 60 °C in an electric oven overnight. Afterwards, the supercapacitor performances of the fabricated electrodes were obtained using a Bio-Logic VMP-300 potentiostat (Knoxville, TN, USA), then EC-Lab V11.33 software (Edmonton, AB, Canada) was used to explore the data.

### **Text S3: Reactor set-up for Photocatalytic procedures**

As previously described by AO Oluwole, *et al.* [1], the photoreactor setup was made up of a wooden box consisting of four Philips 18 W fluorescent daylight lamps to serve as the source of visible light irradiation, each emitting a luminous flux of 1200 lm. Aluminium foil paper was used to line the inside of the wooden box so that light could be reflected and distributed evenly. Three batches of the slurry solution were continually stirred using three magnetic stirrers that were positioned inside the box approximately 10 cm from the lights. The light intensity in the photocatalytic process was calculated using the fluorescent lamps' wattage and the distance between the reactor and the lamp, yielding 142.86 W/m<sup>2</sup>. Conversely, a thermometer positioned within the wooden box was used to measure the reaction setup's temperature, which came out to be 30 °C (±5).

The photocatalytic activities of the synthesized composites NiFe<sub>2</sub>O<sub>4</sub>, SnO<sub>2</sub>, CeO<sub>2</sub>, NiFe<sub>2</sub>O<sub>4</sub>/SnO<sub>2</sub>, NiFe<sub>2</sub>O<sub>4</sub>/CeO<sub>2</sub> and NiFe<sub>2</sub>O<sub>4</sub>/SnO<sub>2</sub>/CeO<sub>2</sub> were assessed using TCN, a common antibiotic. In a nutshell, 50 mg of catalyst was added to 100 mL of TCN solution (30 mg/L, pH 5.5). To achieve the absorption–desorption balance, the suspension was continuously swirled for 30 minutes in the dark prior to illumination. The photocatalyst–pollutant suspension was then illuminated at room temperature using a commercial fluorescent lamp. 5 mL aliquots were taken at predetermined intervals during the exposure to visible light, centrifuged and filtered through a 0.45 µm membrane filter to eliminate any remaining catalyst particles. A UV–vis spectrophotometer (Biochrom, Cambridge, UK) was used to evaluate the filtrates at the absorption wavelength of 357 nm.

The degree of TCN removal was quantitatively evaluated using a Shimadzu TOC-V analyzer, prior to and following the photocatalytic process.

The following formula was used to determine the photocatalyst's photocatalytic efficiency for pollutant degradation:

$$\text{Removal efficiency} = \frac{C_0 - C}{C_0} \times 100\% \quad (1)$$

$C_0$  stands for the concentration of the pollutants at the time ( $t_0$ ) (initial time) before treatment, while  $C$  is the concentration value at the final time after treatment.

**Table S.1: BET surface areas, pore volumes, and pore size diameter of the materials**

| <b>Material</b>                      | <b>Surface area<br/>(<math>\text{m}^2 \text{g}^{-1}</math>)</b> | <b>Pore Volume<br/>(<math>\text{cm}^3 \text{g}^{-1}</math>)</b> | <b>Pore Diameter<br/>(nm)</b> | <b>Crystalline size<br/>(nm)</b> |
|--------------------------------------|-----------------------------------------------------------------|-----------------------------------------------------------------|-------------------------------|----------------------------------|
| NFO                                  | 26.82                                                           | 0.00022                                                         | 27.56                         | 36.49                            |
| $\text{SnO}_2$                       | 11.77                                                           | 0.00078                                                         | 35.46                         | 21.24                            |
| $\text{CeO}_2$                       | 41.58                                                           | 0.00085                                                         | 35.20                         | 16.05                            |
| NFO/ $\text{SnO}_2$                  | 38.71                                                           | 0.00090                                                         | 36.45                         | 27.36                            |
| NFO/ $\text{CeO}_2$                  | 51.93                                                           | 0.0016                                                          | 36.27                         | 20.72                            |
| NFO/ $\text{SnO}_2$ / $\text{CeO}_2$ | 72.99                                                           | 0.0077                                                          | 38.99                         | 10.81                            |

**Figure S.1: SEM images of the as-prepared samples: (a)  $\text{NiFe}_2\text{O}_4$ , (b)  $\text{SnO}_2$ , (c)  $\text{CeO}_2$ , (d)  $\text{NiFe}_2\text{O}_4/\text{SnO}_2$ , (e)  $\text{NiFe}_2\text{O}_4/\text{CeO}_2$  and (f) nanocomposite  $\text{NiFe}_2\text{O}_4/\text{SnO}_2/\text{CeO}_2$**

**(a)**

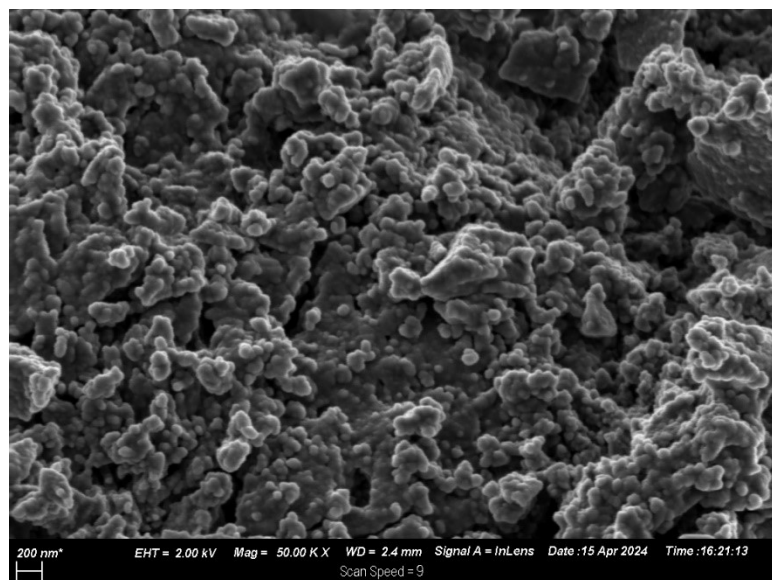

**(b)**

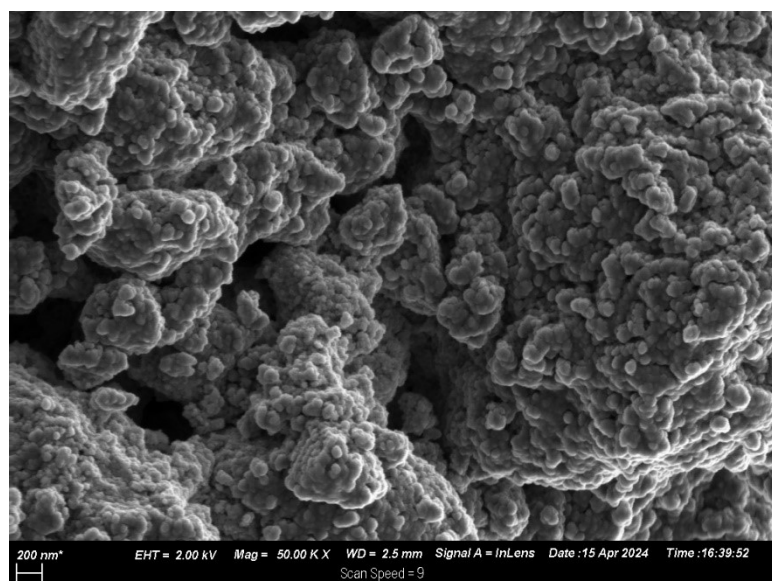

(c)

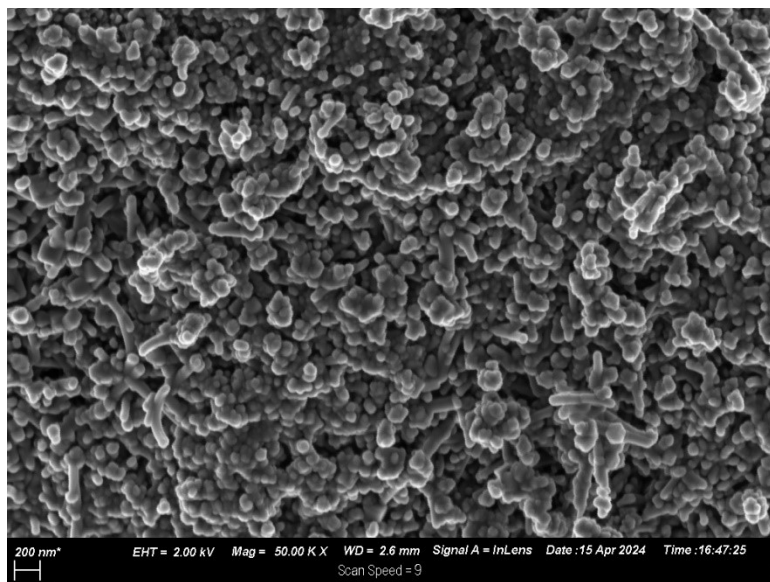

(d)

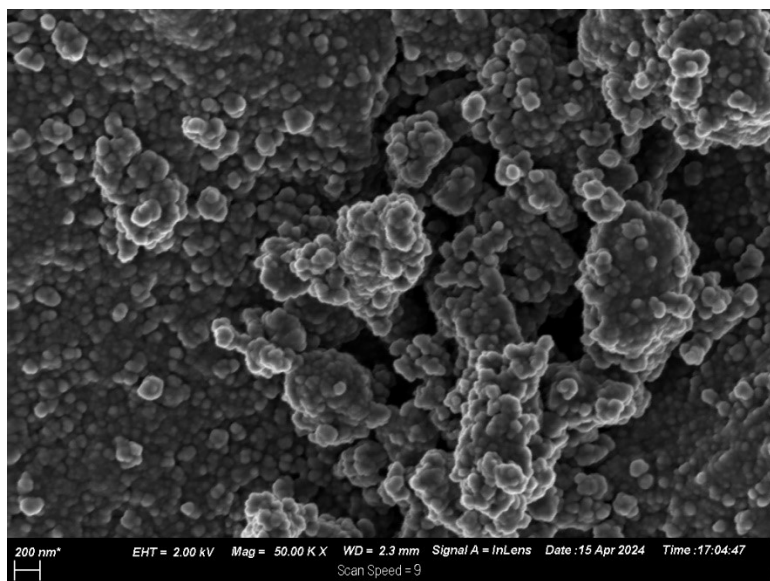

(e)

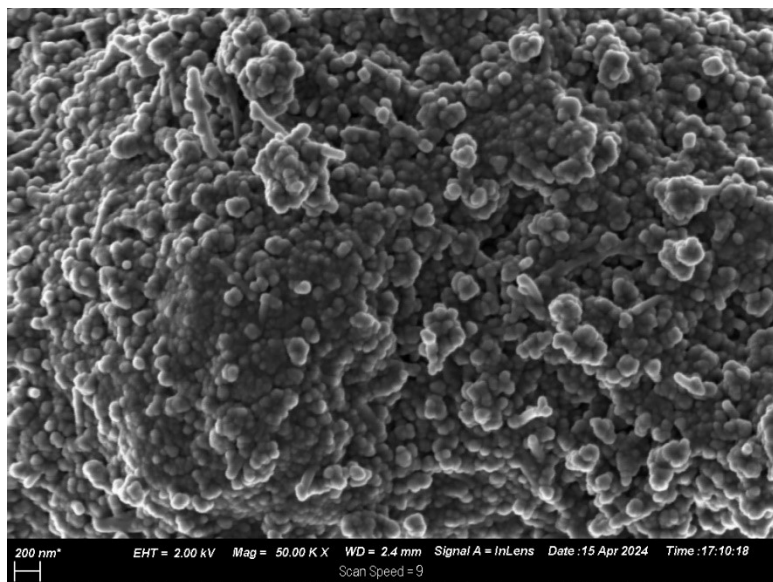

(f)

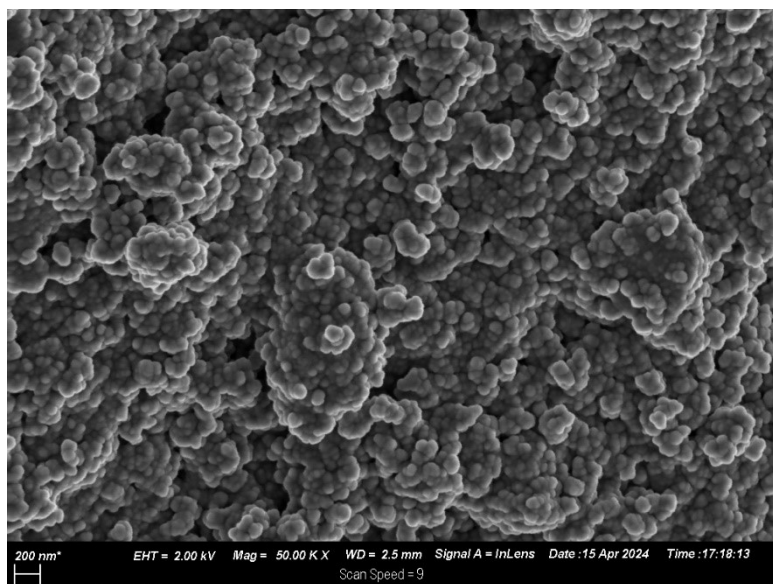

**Figure S.2. Expanded energy band gap plots for the synthesized nanocomposites**

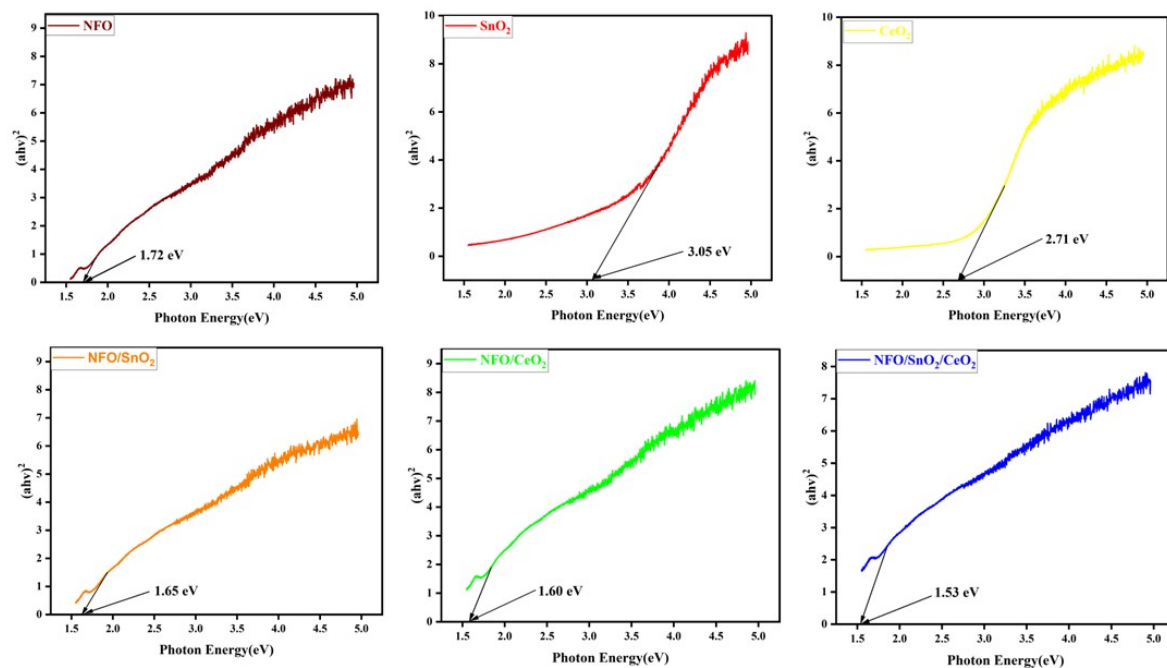

**Table S.2. Comparison of photocatalytic performance with other previously reported photocatalysts for the degradation of TCN in recent years.**

| Nanocomposites                                                                | Amount<br>(mg/L) | Dosage<br>(mg) | Light source<br>(Lamp)                                        | Photocatalytic<br>efficiency | References    |
|-------------------------------------------------------------------------------|------------------|----------------|---------------------------------------------------------------|------------------------------|---------------|
| NiFe <sub>2</sub> O <sub>4</sub> /CeO <sub>2</sub> /GO                        | 20               | 50             | 300 W Xenon                                                   | 95 % in 90 min               | [2]           |
| ZnO/NiO/g-C <sub>3</sub> N <sub>4</sub>                                       | 20               | 50             | 500 W Halogen                                                 | 91 % in 60 min               | [3]           |
| Fe <sub>3</sub> O <sub>4</sub> /BiVO <sub>4</sub> /CdS                        | 10               | 100            | 300 W Xenon                                                   | 87 % in 90 min               | [4]           |
| g-C <sub>3</sub> N <sub>4</sub> /ultrathin MoS <sub>2</sub>                   | 10               | 10             | 250 W metal<br>halide                                         | 96 % in 4 h                  | [5]           |
| Cu-Fe <sub>2</sub> O <sub>3</sub> /Ni-ZnO                                     | 10               | 40             | Xenon lamp<br>(light intensity of<br>300 mW/cm <sup>2</sup> ) | 94 % in 120 min              | [6]           |
| Fe <sub>3</sub> O <sub>4</sub> /ZnO                                           | 50               | 40             | 120-W PAR38<br>warm light bulb                                | 75 % in 120 min              | [7]           |
| BiOCl/Bi <sub>2</sub> WO <sub>6</sub>                                         | 100              | 20             | 350 W xenon                                                   | 94 % in 60 min               | [8]           |
| Bi/ $\alpha$ -Bi <sub>2</sub> O <sub>3</sub> /g-C <sub>3</sub> N <sub>4</sub> | 10               | 10             | 300 W Xenon                                                   | 91 % in 180 min              | [9]           |
| BiOCl@CeO <sub>2</sub>                                                        | 50               | 10             | 300 W Xenon                                                   | 90 % in 120 min              | [10]          |
| NFO/SnO <sub>2</sub> /CeO <sub>2</sub>                                        | 30               | 50             | 72 W fluorescent<br>daylight                                  | 97.92 % in 60 min            | This<br>study |



**Figure S.3: SEM image of the NFO/SnO<sub>2</sub>/CeO<sub>2</sub> nanocomposite after 5-cycle runs for the photodegradation of TCN**

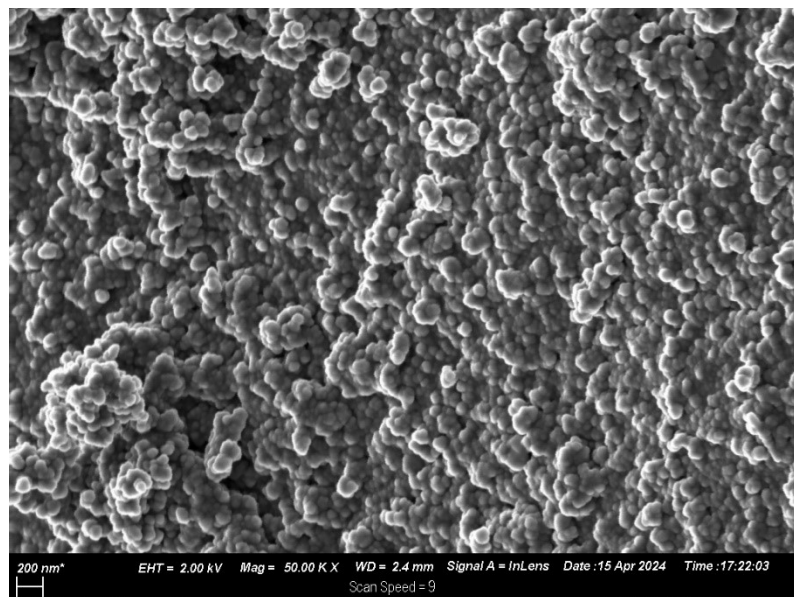

## References

1. Oluwole AO, Yusuf TL, Tichapondwa SM, Daramola MO, Iwarere SA: **Enhanced photocatalytic efficiency of a novel GO/Bi<sub>2</sub>SO<sub>5</sub>/AgBr ternary heterojunction for the degradation of tetracycline and rhodamine B.** *J Environ Chem Eng* 2025;116777.
2. Nawaz R, Aziz MH, Asif M, Noor F, Aligayev A, Ali SM, Alam M, Papanikolaou S, Huang Q: **Evaluation of tetracycline photocatalytic degradation using NiFe<sub>2</sub>O<sub>4</sub>/CeO<sub>2</sub>/GO nanocomposite for environmental remediation: In silico molecular docking, antibacterial performance, degradation pathways, and DFT calculations.** *Sep Purif Technol* 2024, **351**:128074.
3. Dineshbabu N, Jayaprakash R, Karuppasamy P, Arun T, Vijaya JJ, Nimshi RE, Pandian MS, Packiam SM, Ramasamy P: **Investigation on Tetracycline degradation and bactericidal properties of binary and ternary ZnO/NiO/g-C<sub>3</sub>N<sub>4</sub> composites prepared by a facile co-precipitation method.** *J Environ Chem Eng* 2022, **10**(3):107368.
4. Xu G, Du M, Li T, Guan Y, Guo C: **Facile synthesis of magnetically retrievable Fe<sub>3</sub>O<sub>4</sub>/BiVO<sub>4</sub>/CdS heterojunction composite for enhanced photocatalytic degradation of tetracycline under visible light.** *Sep Purif Technol* 2021, **275**:119157.
5. Lu X, Jin Y, Zhang X, Xu G, Wang D, Lv J, Zheng Z, Wu Y: **Controllable synthesis of graphitic C<sub>3</sub>N<sub>4</sub>/ultrathin MoS<sub>2</sub> nanosheet hybrid nanostructures with enhanced photocatalytic performance.** *Dalton Transactions* 2016, **45**(39):15406-15414.
6. Li Y, Liu K, Zhang J, Yang J, Huang Y, Tong Y: **Engineering the band-edge of Fe<sub>2</sub>O<sub>3</sub>/ZnO nanoplates via separate dual cation incorporation for efficient photocatalytic performance.** *Ind Eng Chem Res* 2020, **59**(42):18865-18872.
7. Sabar S, Jamil AM, Zhao Y, Yusof ENM, Schneider R, Mohamed AR, Kuwahara Y, Mori K, Yamashita H: **Construction of Fe<sub>3</sub>O<sub>4</sub>/ZnO heterostructure photocatalyst derived from Fe-doped ZIF-8 for enhanced photocatalytic degradation of tetracycline and hydrogen peroxide production.** *New J Chem* 2025.
8. Zhang H, Zhu Z, Huang Y, Yu J, Li M: **Construction of Z-Scheme Heterojunction BiOCl/Bi<sub>2</sub>WO<sub>6</sub> for Visible-Light Photocatalytic Degradation of Tetracycline Hydrochloride.** *Separations* 2025, **12**(5):111.
9. Chen D, Wu S, Fang J, Lu S, Zhou G, Feng W, Yang F, Chen Y, Fang Z: **A nanosheet-like  $\alpha$ -Bi<sub>2</sub>O<sub>3</sub>/g-C<sub>3</sub>N<sub>4</sub> heterostructure modified by plasmonic metallic Bi and oxygen vacancies with high photodegradation activity of organic pollutants.** *Sep Purif Technol* 2018, **193**:232-241.
10. Wang H, Liao B, Lu T, Ai Y, Liu G: **Enhanced visible-light photocatalytic degradation of tetracycline by a novel hollow BiOCl@ CeO<sub>2</sub> heterostructured microspheres: Structural characterization and reaction mechanism.** *J Hazard Mater* 2020, **385**:121552.
